# Supplementary material for: Relation of severe COVID-19 in Scotland to transmission-related factors and risk conditions eligible for shielding support: REACT-SCOT case-control study
Source: Springer Nature journal article supplement (doi:10.1186/s12916-021-02021-5), 2021-06-22
Supplement: MOESM1 [file 19287708]

# Supplementary Material

## Supplementary Figures

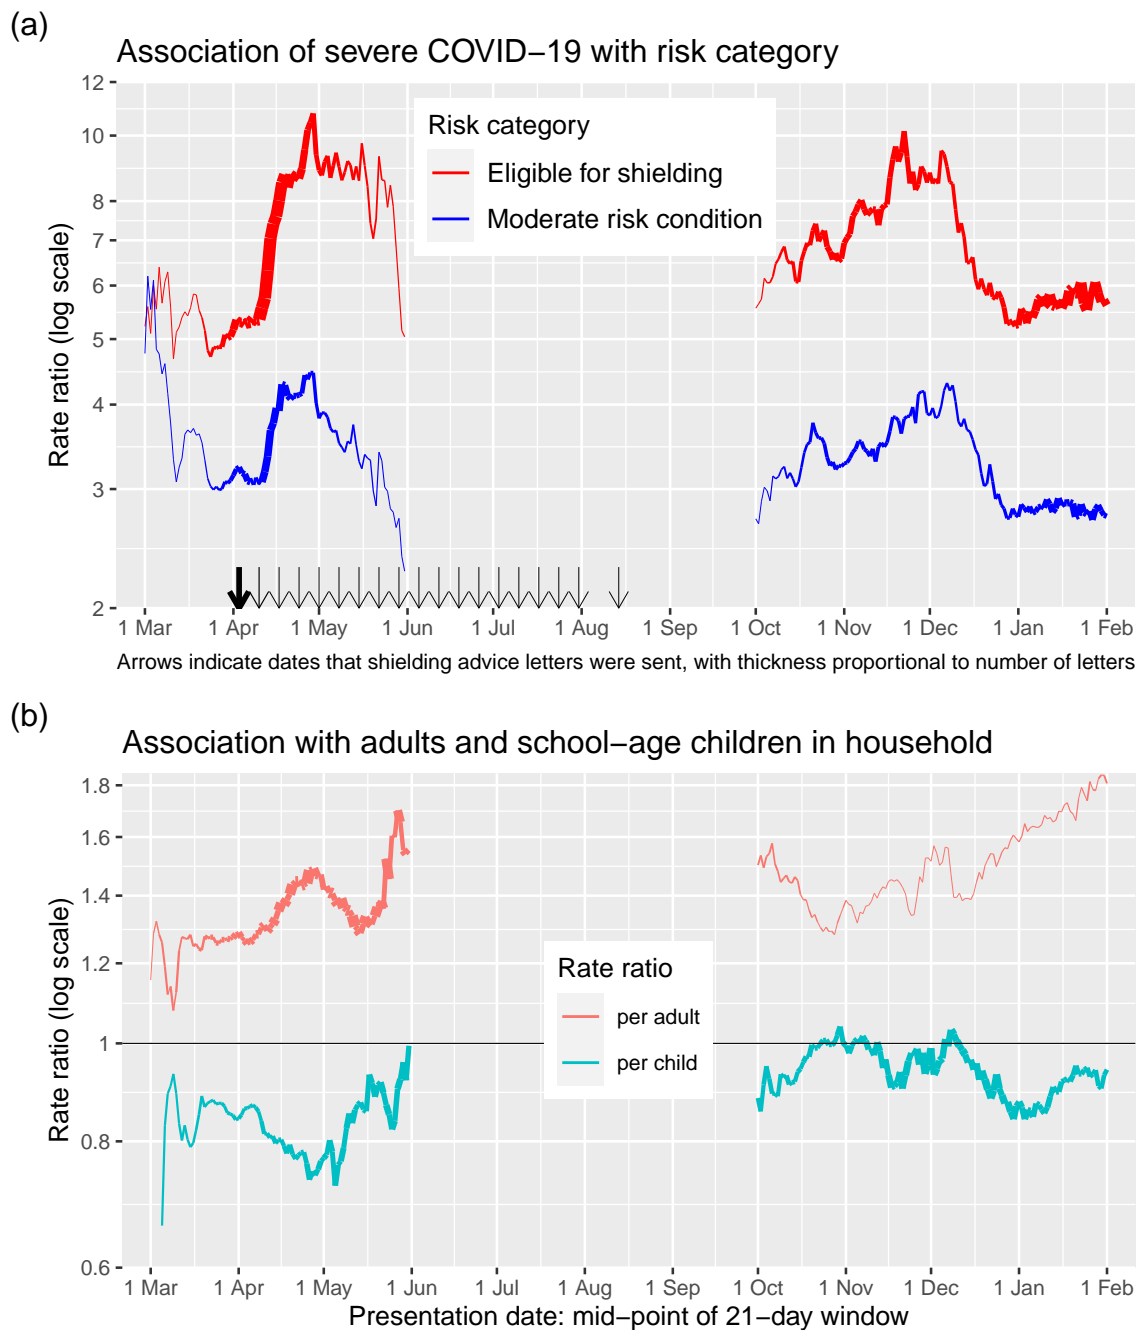

Data from 1 June to 30 September 2020 are omitted because the numbers are small

**Fig S1.** (a) Rate ratios for severe COVID-19 excluding care home residents, by risk group and sliding window of presentation dates. (b) Rate ratio for severe COVID-19 per adult and per child in household, excluding care home residents, in model with number of adults, number of children and SIMD deprivation score as covariates. Line thickness is proportional to precision of estimate. Labels on the y axes are untransformed rate ratios, though the axis scales are log-transformed

## Supplementary Tables

**Table S1.** Shielding eligibility cohort by eligibility category and age

|                                       | Age group   |             |             |             | All    |
|---------------------------------------|-------------|-------------|-------------|-------------|--------|
|                                       | 0-39        | 40-59       | 60-74       | 75 or more  |        |
| <b>Shielding eligibility category</b> |             |             |             |             |        |
| Solid organ transplant                | 1170 (17%)  | 2644 (38%)  | 2520 (37%)  | 537 (8%)    | 6872   |
| Specific cancers                      | 1417 (5%)   | 6609 (25%)  | 11303 (42%) | 7367 (28%)  | 26699  |
| Severe respiratory                    | 3646 (4%)   | 18465 (21%) | 37221 (43%) | 27261 (31%) | 86599  |
| Rare diseases                         | 2527 (23%)  | 3092 (28%)  | 2557 (23%)  | 2894 (26%)  | 11072  |
| On immunosuppressants                 | 6465 (20%)  | 10754 (34%) | 9577 (30%)  | 5010 (16%)  | 31807  |
| Additional conditions                 | 6087 (12%)  | 13870 (28%) | 15791 (32%) | 13842 (28%) | 49595  |
| All shielding categories              | 21312 (10%) | 55434 (26%) | 78969 (37%) | 56911 (27%) | 212644 |

Percentages are row percentages

**Table S2.** Severe test-positive cases classified by hospital onset status (as defined by ECDC) and recent inpatient exposure

|                              | No recent hospital exposure | Recent hospital exposure |
|------------------------------|-----------------------------|--------------------------|
| Community onset              | 6464 (94%)                  | 569 (27%)                |
| Non-hospital onset           | 279 (4%)                    | 66 (3%)                  |
| Indeterminate hospital onset | 107 (2%)                    | 270 (13%)                |
| Probable hospital onset      | 0 (0%)                      | 434 (20%)                |
| Definite hospital onset      | 0 (0%)                      | 794 (37%)                |
| All ECDPC categories         | 6850                        | 2133                     |

Percentages are column percentages

ECDC, European Centre for Disease Prevention and Control

**Table S3.** Dates of sending advice letters to those eligible for shielding

|                          | 3 Apr        | 10 Apr      | 17 Apr     | 24 Apr     | 1 May or later | All    |
|--------------------------|--------------|-------------|------------|------------|----------------|--------|
| Solid organ transplant   | 6674 (97%)   | 10 (0%)     | 8 (0%)     | 22 (0%)    | 143 (2%)       | 6857   |
| Specific cancers         | 17485 (78%)  | 241 (1%)    | 556 (2%)   | 897 (4%)   | 3132 (14%)     | 22311  |
| Severe respiratory       | 77389 (90%)  | 424 (0%)    | 705 (1%)   | 2170 (3%)  | 4837 (6%)      | 85525  |
| Rare diseases            | 916 (11%)    | 6363 (76%)  | 159 (2%)   | 474 (6%)   | 444 (5%)       | 8356   |
| On immunosuppressants    | 13302 (43%)  | 9806 (32%)  | 4007 (13%) | 1658 (5%)  | 2067 (7%)      | 30840  |
| Additional conditions    | 2287 (5%)    | 7290 (17%)  | 6626 (16%) | 7554 (18%) | 18024 (43%)    | 41781  |
| All shielding categories | 118053 (60%) | 24134 (12%) | 12061 (6%) | 12775 (7%) | 28647 (15%)    | 195670 |

Percentages are row percentages
